# Supplementary material for: Size–strain distribution analysis of SnO2 nanoparticles and their multifunctional applications as fiber optic gas sensors, supercapacitors and optical limiters
Source: Royal Society of Chemistry journal article supplement (doi:10.1039/c6ra20503h), 2016-01-01
Supplement: c6ra20503h1.pdf [file c6ra20503h1.pdf]

## Electronic Supplementary Information (ESI)

### **Size-Strain Distribution Analysis of SnO<sub>2</sub> Nanoparticles and its Multifunctional Applications of Fiber Optic Gas Sensor, Supercapacitor and Optical Limiter**

*K. Manikandan<sup>a</sup>, S. Dhanuskodi<sup>a\*</sup>, Anitta Rose Thomas<sup>b</sup>, N. Maheswari<sup>c</sup>, G. Muralidharan<sup>c</sup> and D. Sastikumar<sup>d</sup>*

*<sup>a</sup>Nonlinear Optical Materials Laboratory, School of Physics, Bharathidasan University, Tiruchirappalli - 620 024, India.*

*<sup>b</sup>Light and Matter Physics Group, Raman Research Institute, Bangalore - 560 080, India.*

*<sup>c</sup>Department of Physics, Gandhigram Rural Institute-Deemed University, Gandhigram, Dindigul-624 302, India.*

*<sup>d</sup>Department of Physics, National Institute of Technology, Tiruchirappalli-620 015, India.*

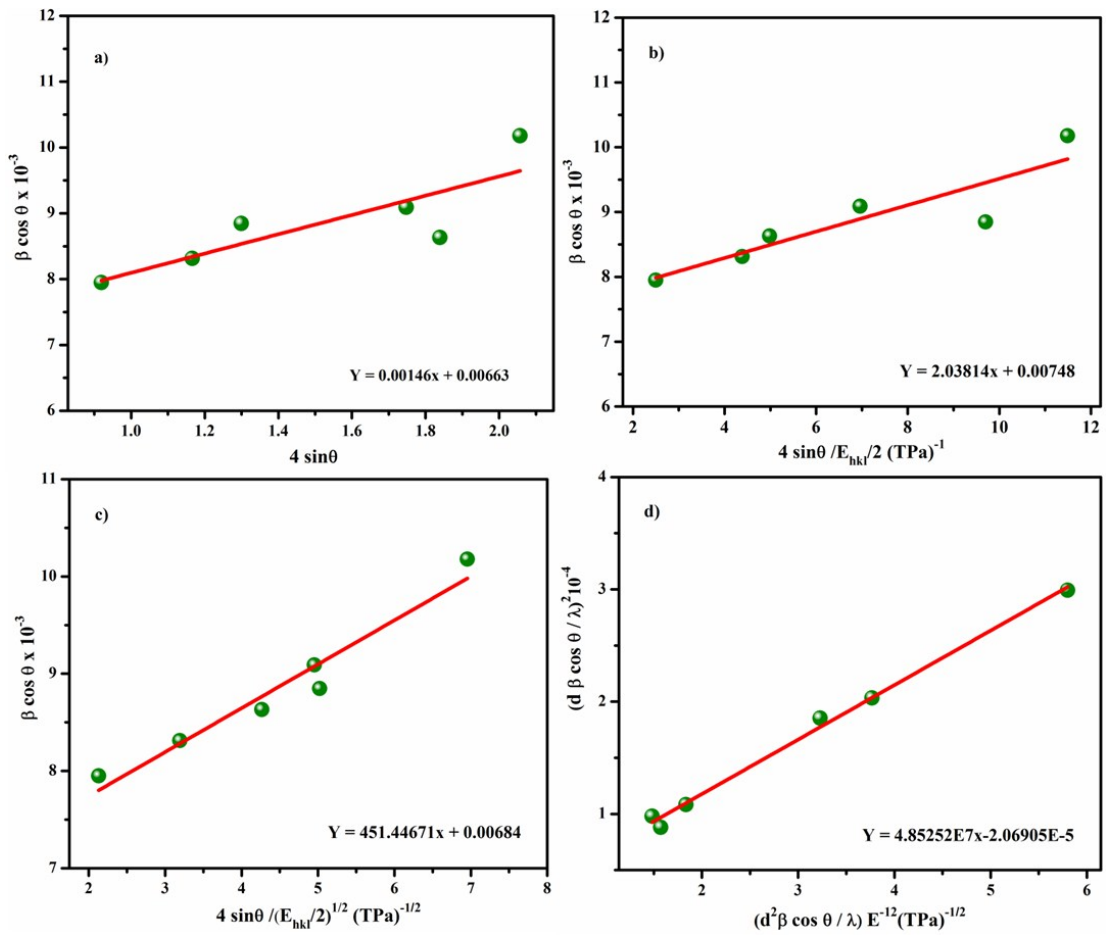

**Fig. S1** (a) UDM, (b) USDM, (c) UDEDM and (d) SSP plot of SnO<sub>2</sub> NPs.

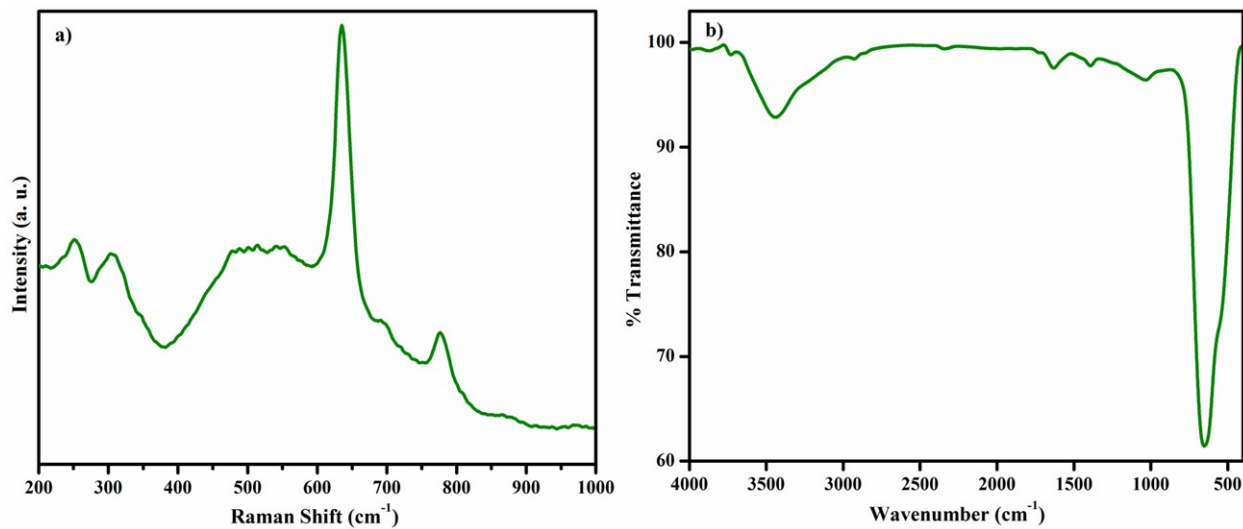

**Fig. S2** (a) Micro-Raman and (b) FTIR spectrum of  $\text{SnO}_2$  NPs

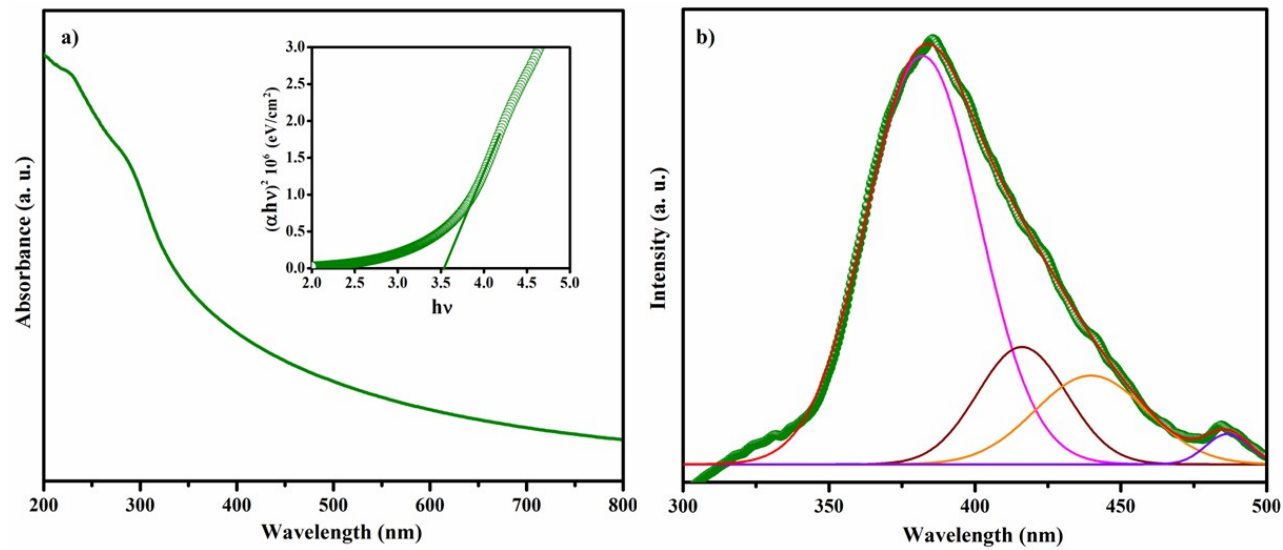

**Fig. S3** (a) UV-Vis absorption (inset: Tauc plot) and (b) PL spectrum for  $\text{SnO}_2$  NPs.

**Table S1.** Comparison of the fiber optic gas sensing performance of SnO<sub>2</sub> NPs with other nanomaterials towards ammonia at ambient temperature.

| Materials                                   | Morphology      | Sensitivity<br>(counts/100ppm) | Ref          |
|---------------------------------------------|-----------------|--------------------------------|--------------|
| SWCNT<br>(Purity:94wt%,<br>diameter:1.3 nm) | Nanotubes       | 11                             | 40           |
| Li: ZnO                                     | Nanocrystalline | 15                             | 41           |
| Ag                                          | Nanowires       | 17                             | 42           |
| SnO <sub>2</sub>                            | Nanoparticles   | 18                             | Present work |

**Table S2.** Comparison of specific capacitance of SnO<sub>2</sub> NPs electrode with other metal oxide nanostructures.

| Materials                      | Morphology                 | Electrolyte | Current<br>density      | Specific<br>capacitance<br>(F.g <sup>-1</sup> ) | Ref          |
|--------------------------------|----------------------------|-------------|-------------------------|-------------------------------------------------|--------------|
| CuO                            | Nanoporus                  | 3M KOH      | 3.5 mA.cm <sup>-2</sup> | 431                                             | 45           |
| NiO                            | Nanocluster                | 1M KOH      | 0.3 A.g <sup>-1</sup>   | 449                                             | 46           |
| CO <sub>3</sub> O <sub>4</sub> | Coralliod<br>Nanostructure | 3M KOH      | 0.5 A.g <sup>-1</sup>   | 591                                             | 47           |
| MnO <sub>2</sub>               | Nanorod                    | 1M KOH      | 1 A.g <sup>-1</sup>     | 821                                             | 48           |
| SnO <sub>2</sub>               | Nanoparticles              | 2M KOH      | 2 mA.cm <sup>-2</sup>   | 1686                                            | Present work |

**Table S3.** Comparison of the NLO parameters of SnO<sub>2</sub> NPs with other NLO nanomaterials.

| Laser                 | Materials                                                                  | Energy (μJ) | Intensity (I <sub>0</sub> ) (GW/m <sup>2</sup> ) | NLO Response | β x 10 <sup>-11</sup> m/W | Ref.         |
|-----------------------|----------------------------------------------------------------------------|-------------|--------------------------------------------------|--------------|---------------------------|--------------|
| 532 nm, 6.5 ns, 10 Hz | ZrS <sub>3</sub> /RGO Composites                                           | 32          | 1430                                             | RSA          | 62.7                      | 55           |
| 532 nm, 5 ns, 0.1 Hz  | (1-x) BiFeO <sub>3</sub> -x NaNbO <sub>3</sub> Multiferroic Nanocomposites | 40          | -                                                | TPA          | 10                        | 56           |
| 532 nm, 5 ns, 0.2 Hz  | CuO NPs                                                                    | 50          | -                                                | TPA          | 6.4                       | 52           |
| 532 nm, 40 ns, 1 kHz  | MAPbI <sub>3</sub> Perovskite film                                         | -           | 2.5                                              | TPA          | 22200                     | 57           |
| 532 nm, 5 ns, 1 Hz    | ErMn <sub>1-x</sub> Cr <sub>x</sub> O <sub>3</sub> NPs                     | 90          | -                                                | TPA          | 1.4                       | 58           |
| 532 nm, 5 ns, 10 Hz   | SnO <sub>2</sub> NPs                                                       | 50          | 2.83                                             | TPA          | 1.7                       | Present work |
| 532 nm, 5 ns, 10 Hz   | SnO <sub>2</sub> NPs                                                       | 100         | 5.68                                             | TPA          | 2.1                       | Present work |
